# Supplementary material for: Transcriptomic and functional network features of lung squamous cell carcinoma through integrative analysis of GEO and TCGA data
Source: PubMed Central journal article supplement (PMC6203807; doi:10.1038/s41598-018-34160-w), 2018-10-26

**Supplementary information:**

**Transcriptomic and functional network features of lung squamous cell carcinoma through integrative analysis of GEO and TCGA data**

Yin Li, Jie Gu, Fengkai Xu, Qiaoliang Zhu, Di Ge<sup>#</sup> and Chunlai Lu<sup>#</sup>

Department of Thoracic Surgery, Zhongshan Hospital, Fudan University, Shanghai, P. R. China.

<sup>#</sup>Corresponding authors: Di Ge, M.D, Department of Thoracic Surgery, Zhongshan Hospital, Fudan University, 180 Fenglin Road, Shanghai, 200032, P.R.China, Tel. /Fax: +86 021 64041990-2559, E-mail address: [ge.di@zs-hospital.sh.cn](mailto:ge.di@zs-hospital.sh.cn); Chunlai Lu, M.D, Department of Thoracic Surgery, Zhongshan Hospital, Fudan University, 180 Fenglin Road, Shanghai, 200032, P.R.China, Tel. /Fax: +86 021 64041990-2559, E-mail address: [lu.chunlai@zs-hospital.sh.cn](mailto:lu.chunlai@zs-hospital.sh.cn).

**Running title:** Transcriptomic and functional network features of lung squamous cell carcinoma

**Figure legend:**

Supplementary figure 1. Survival analysis for differentially expressed genes in LUSC. Survival curves showing 20 genes which were related to overall patient survival rate. P-value set for this analysis is less than 0.05.

Supplementary figure 2. Survival analysis for differentially expressed genes in LUSC. Survival curves showing 20 genes which were related to overall patient survival rate. P-value set for this analysis is less than 0.05.

Supplementary figure 3. Survival analysis showing four lncRNAs were associated with patients overall survival ( $p < 0.05$ ).

Supplementary figure 4. Functional enrichment analysis for the 60 survival-related genes.

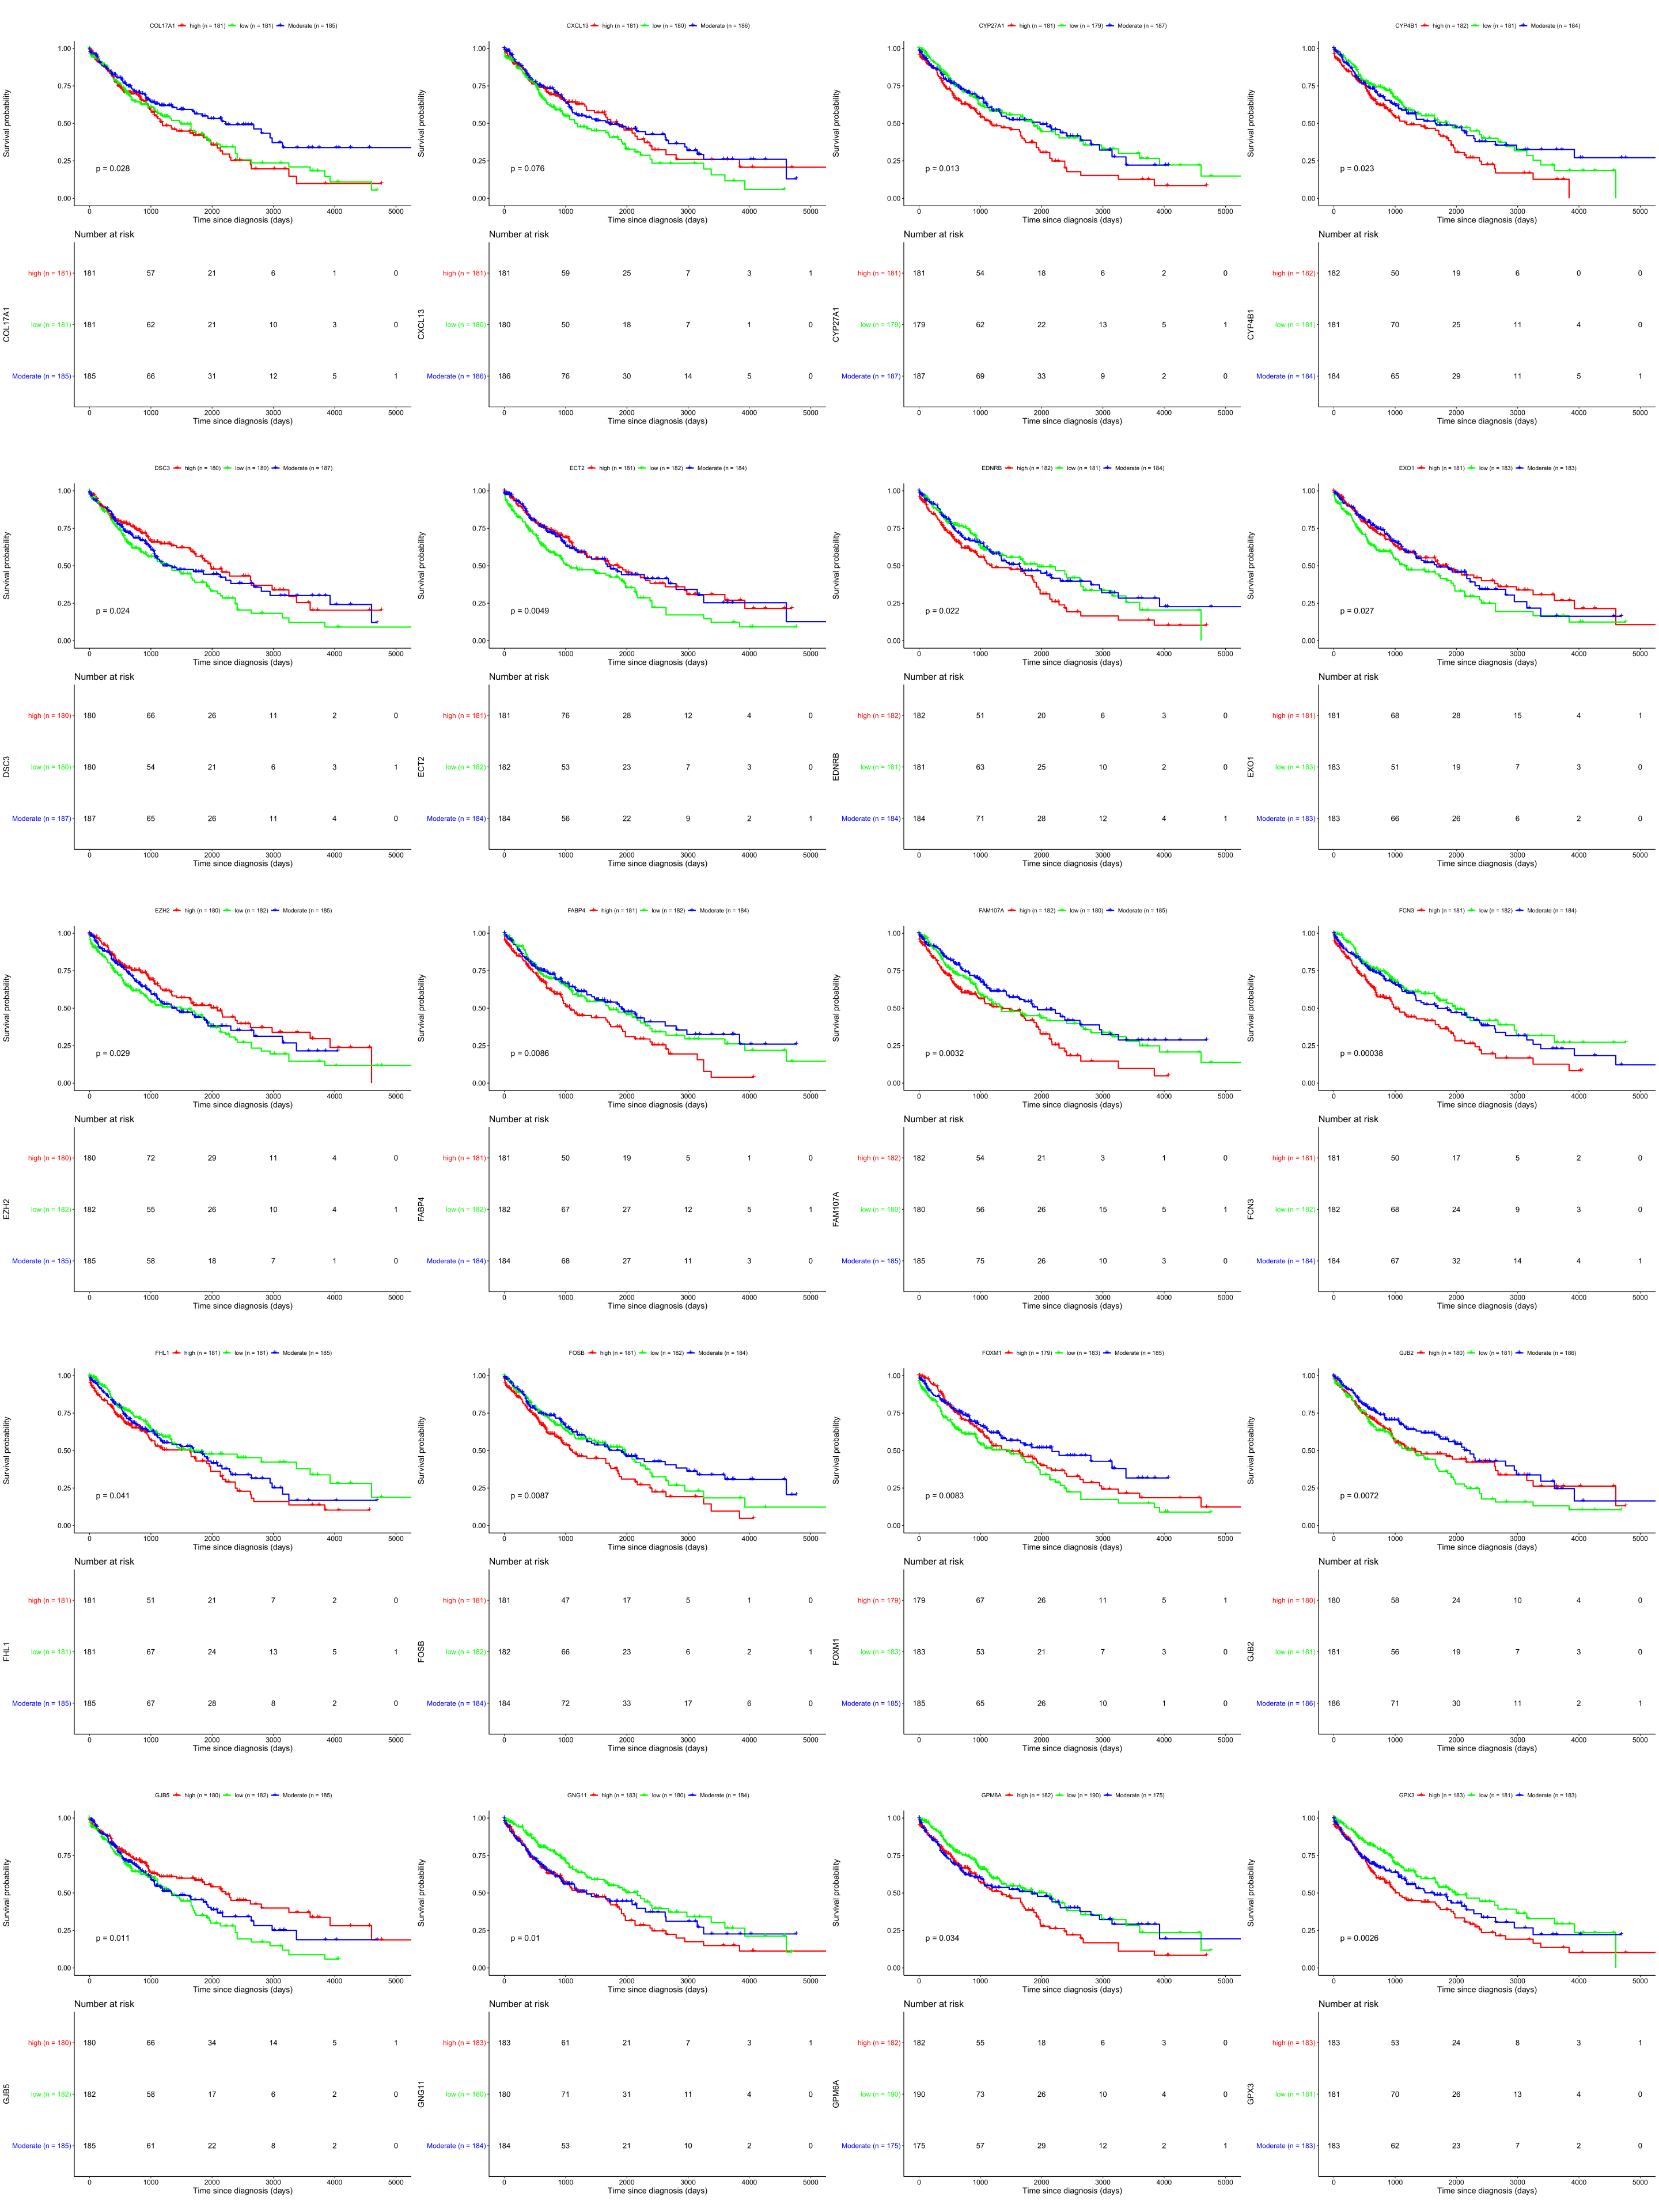

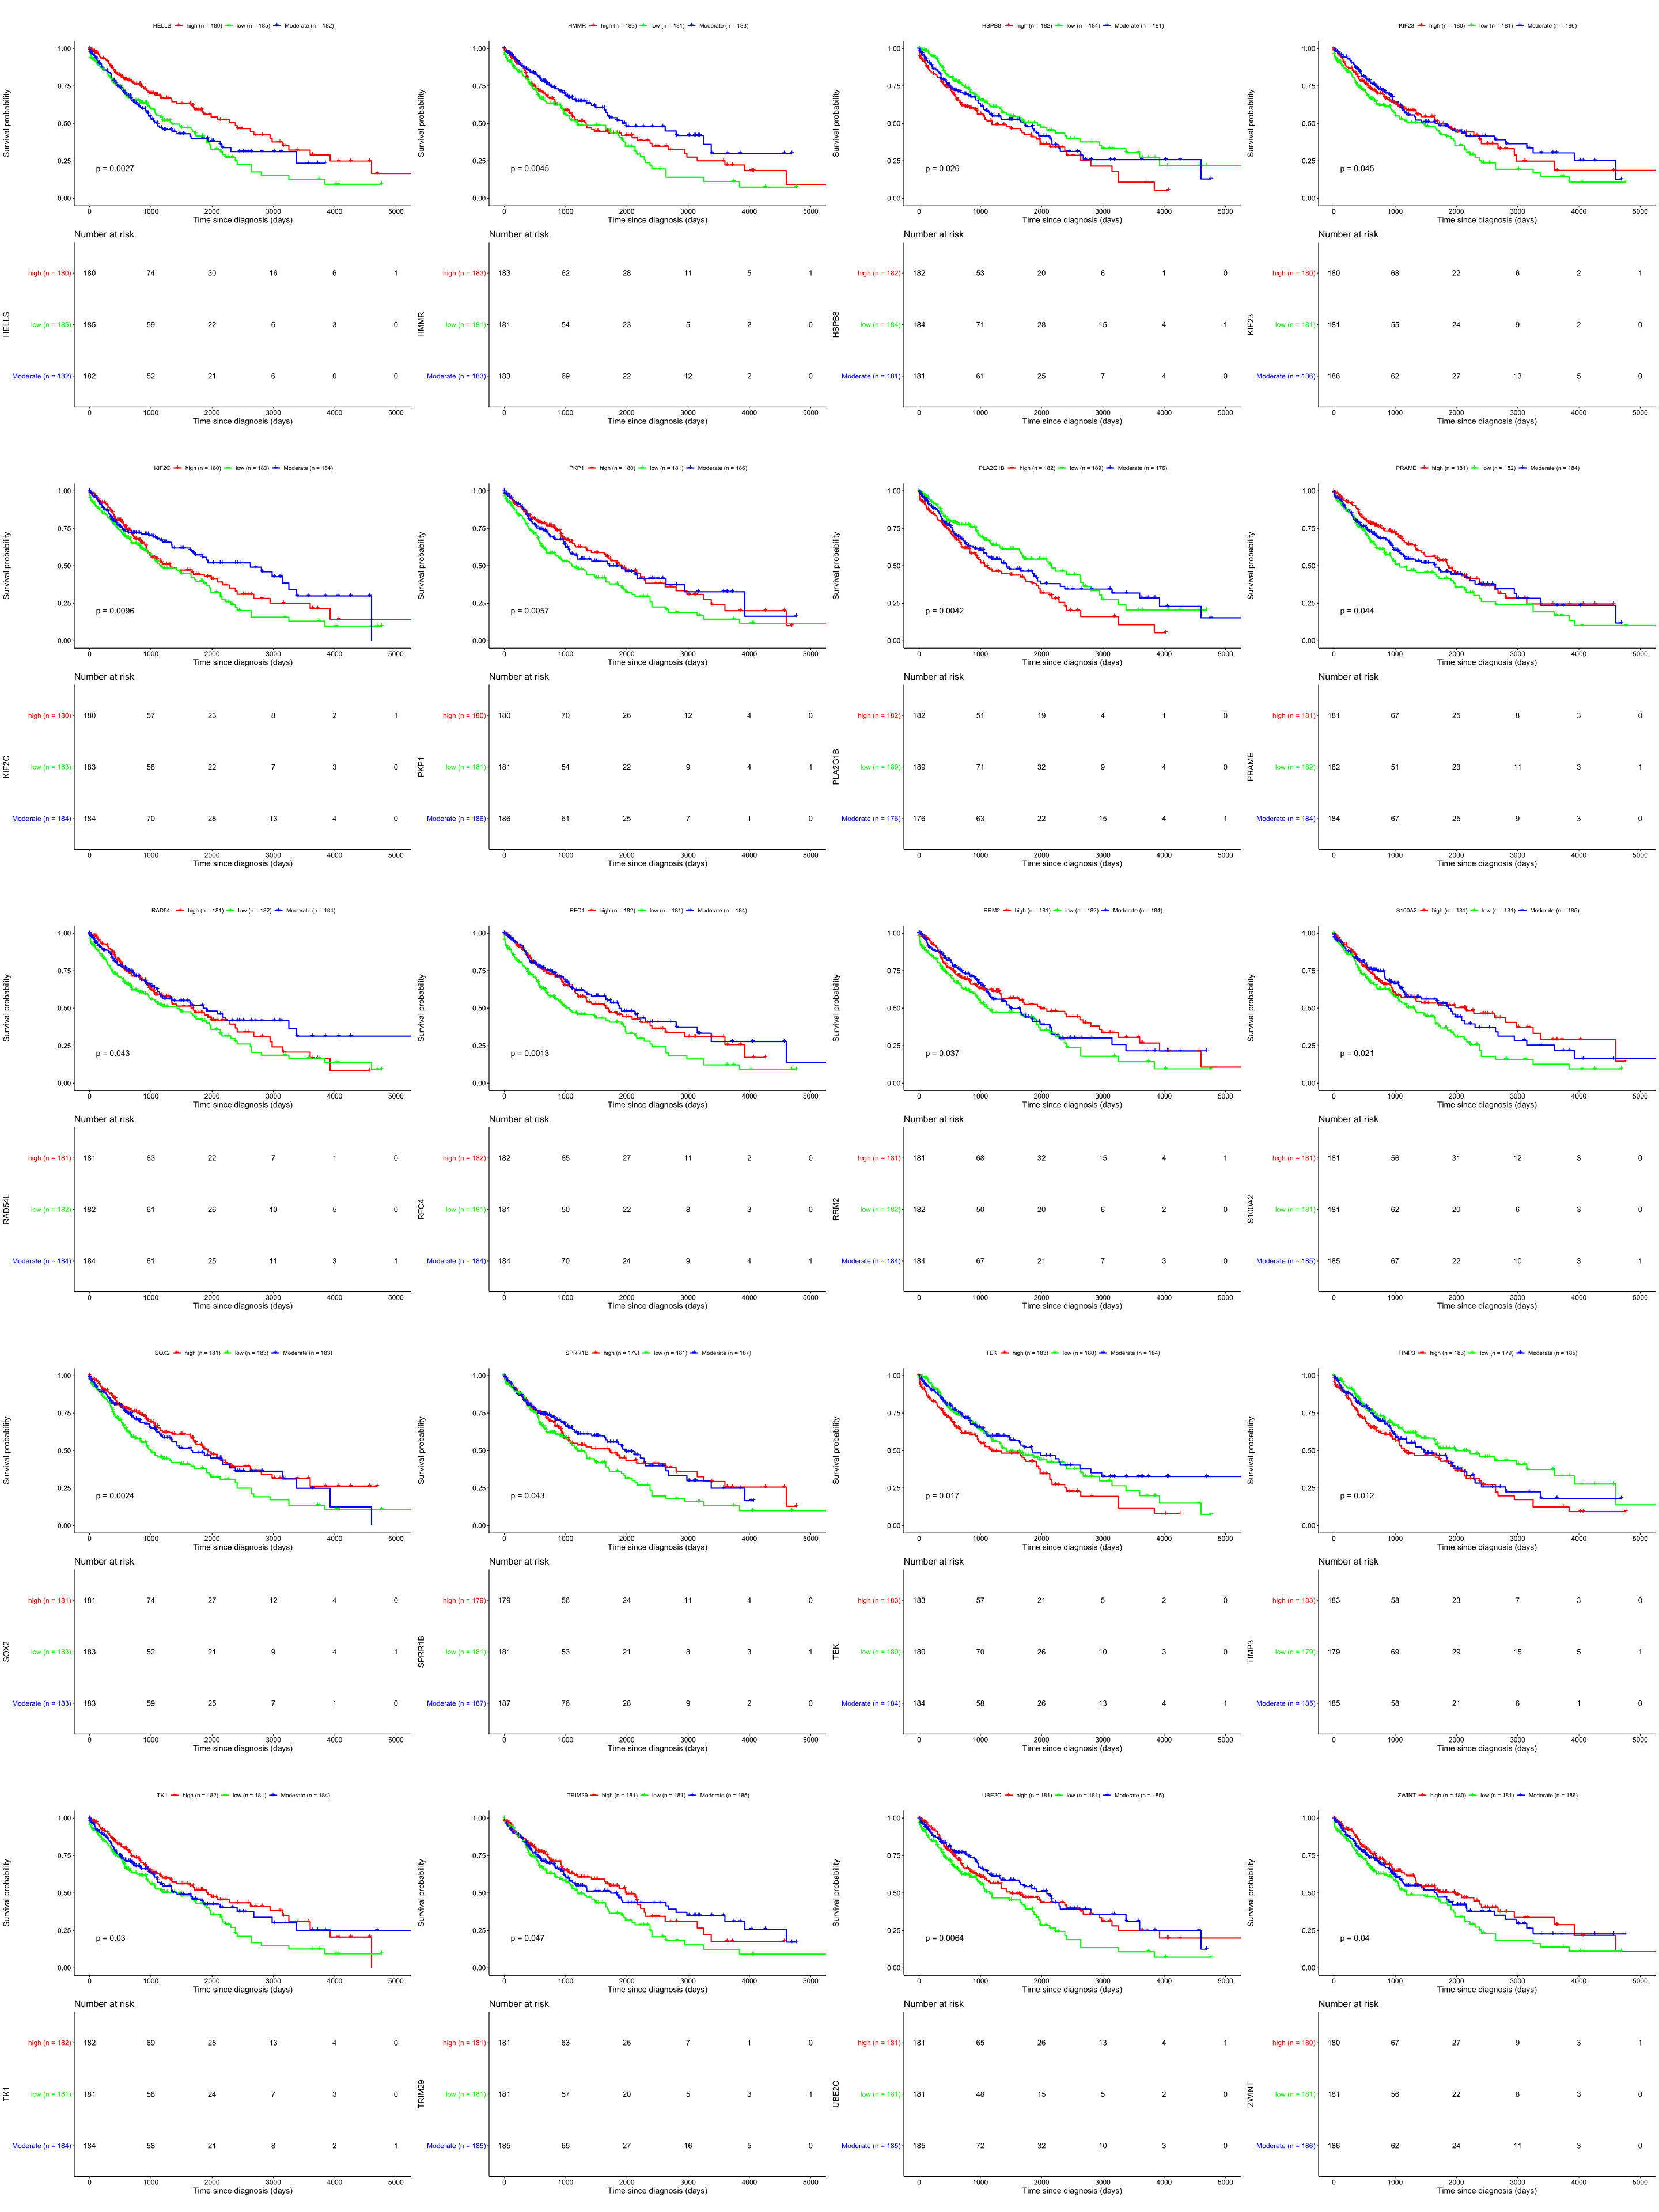

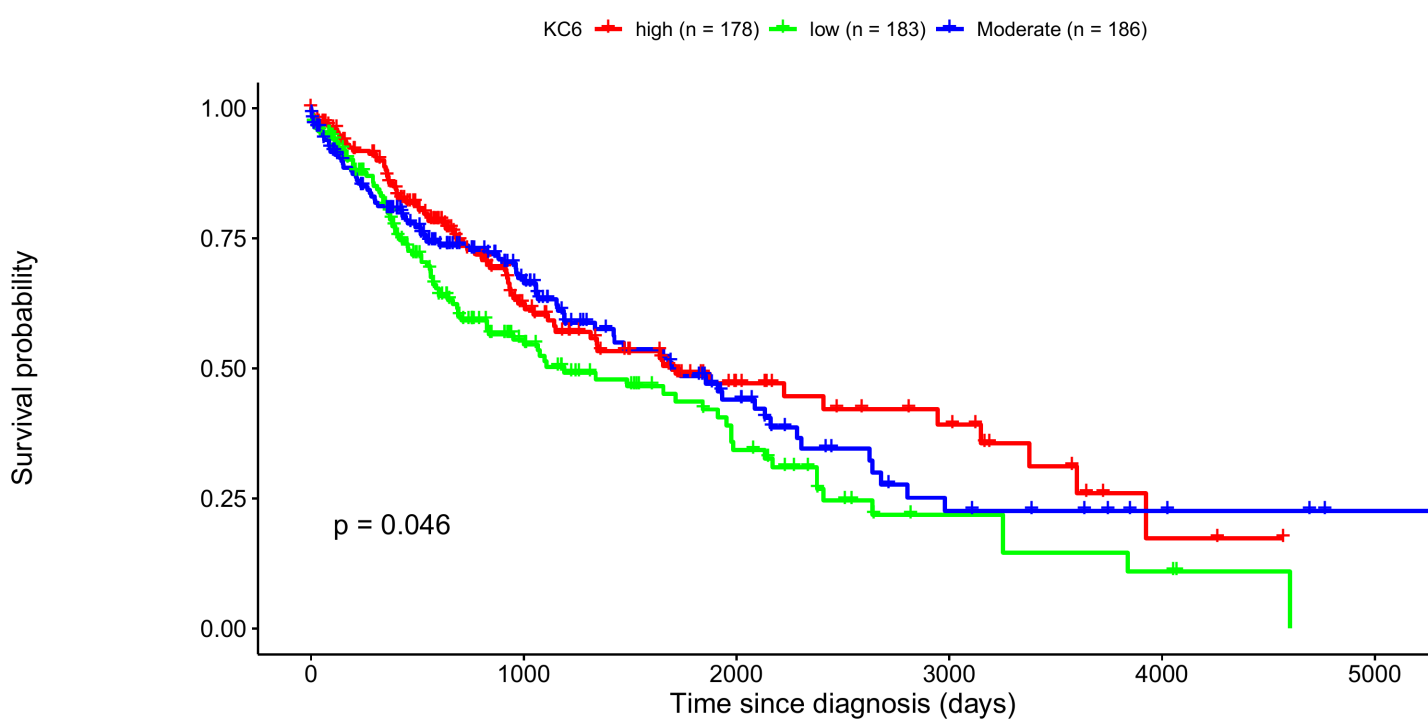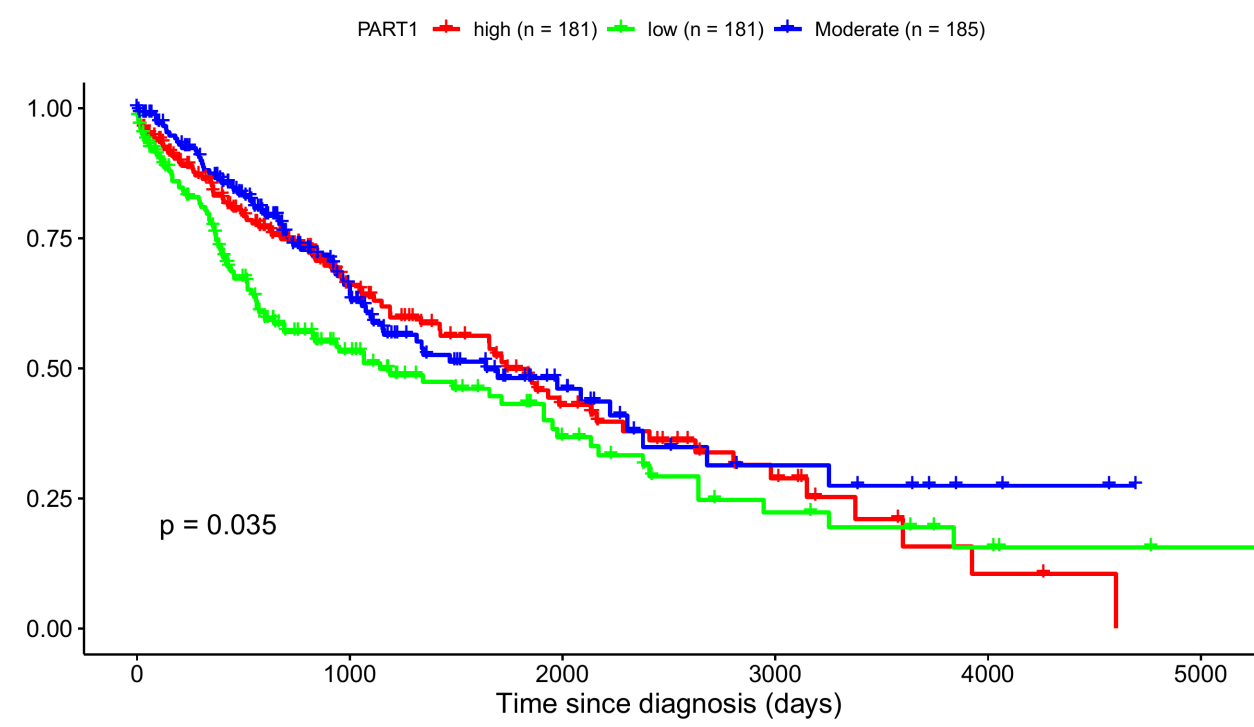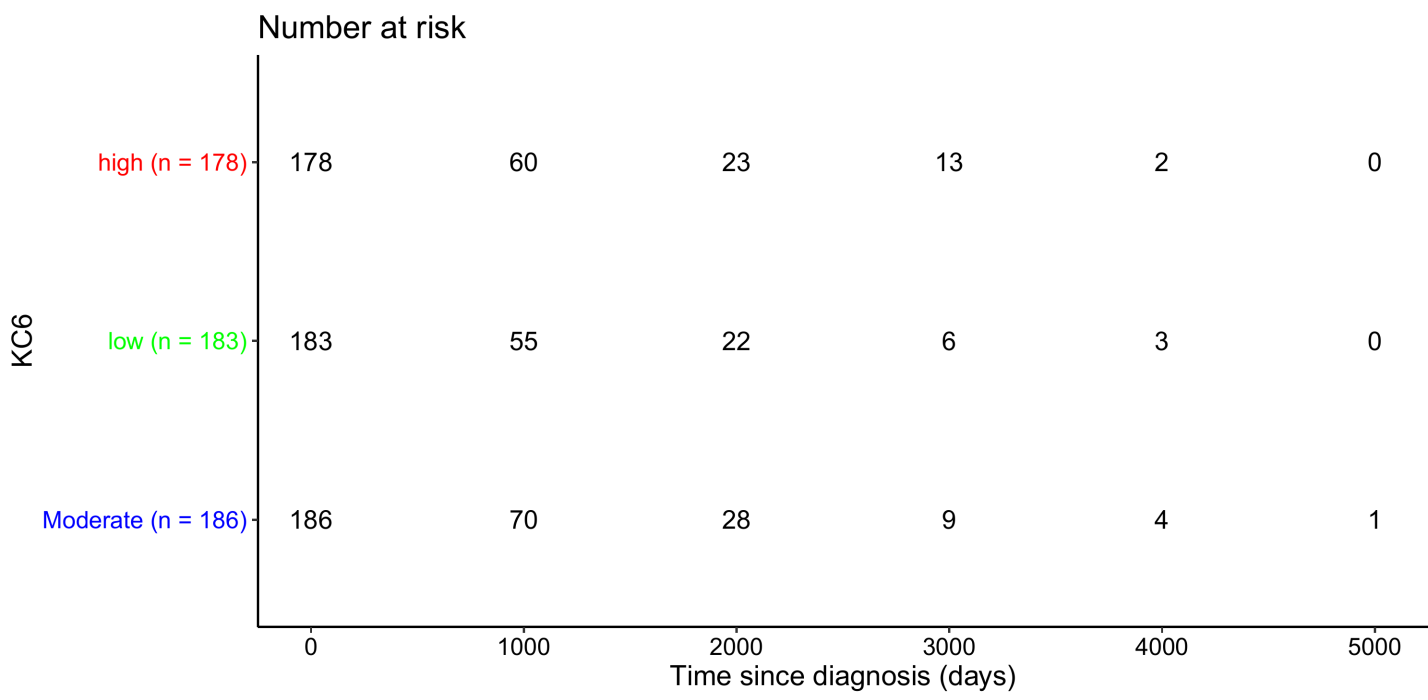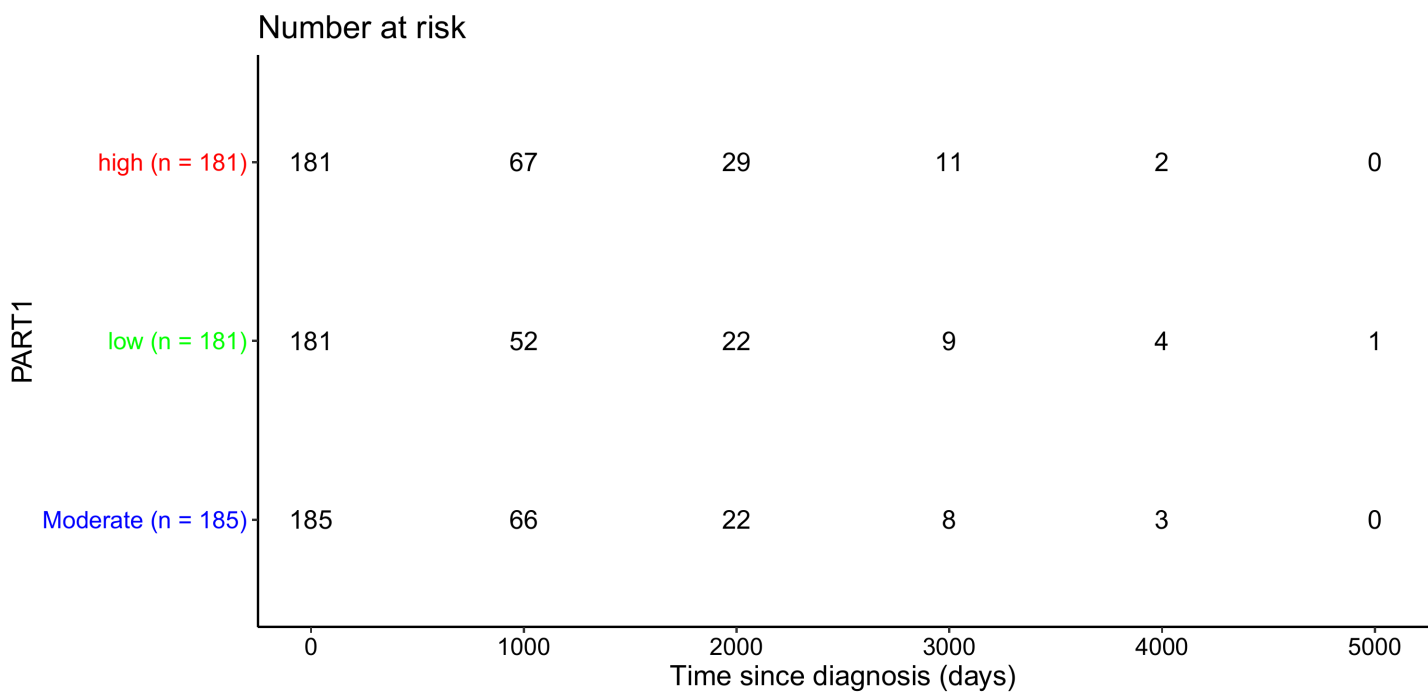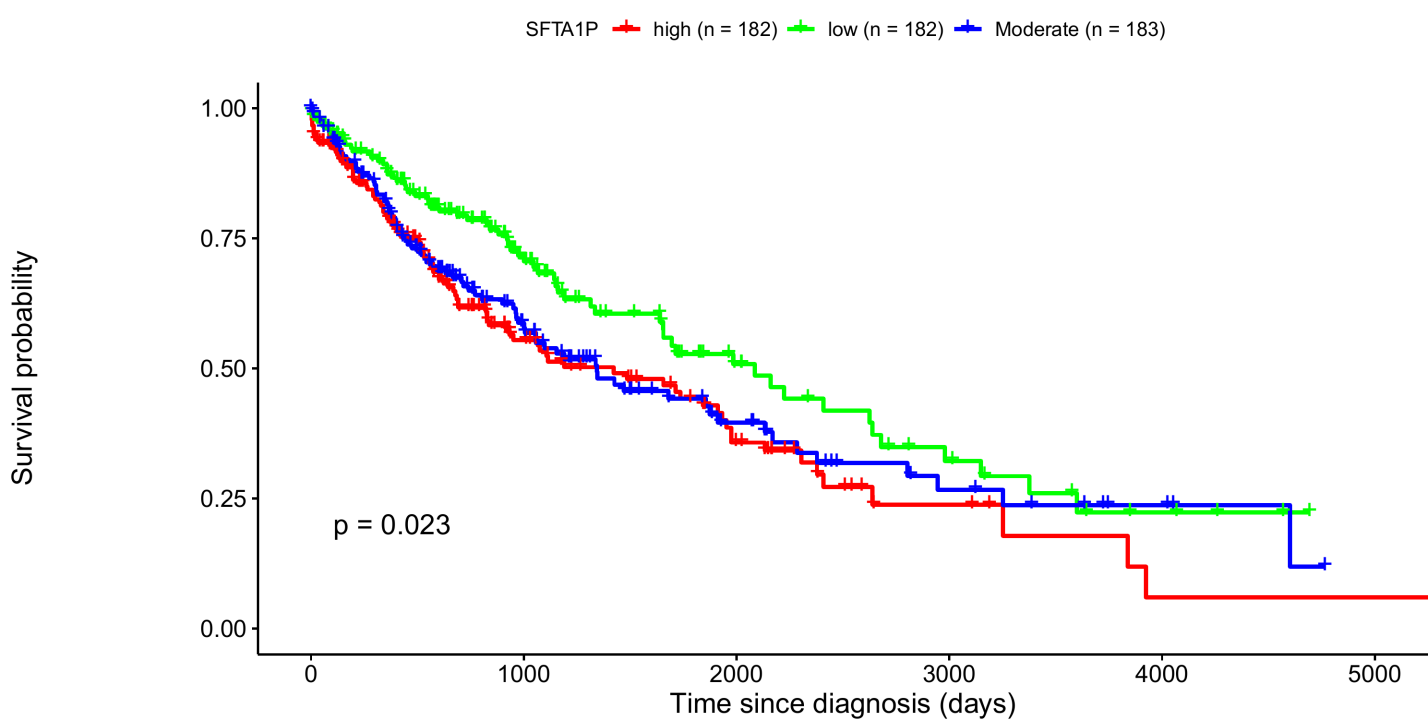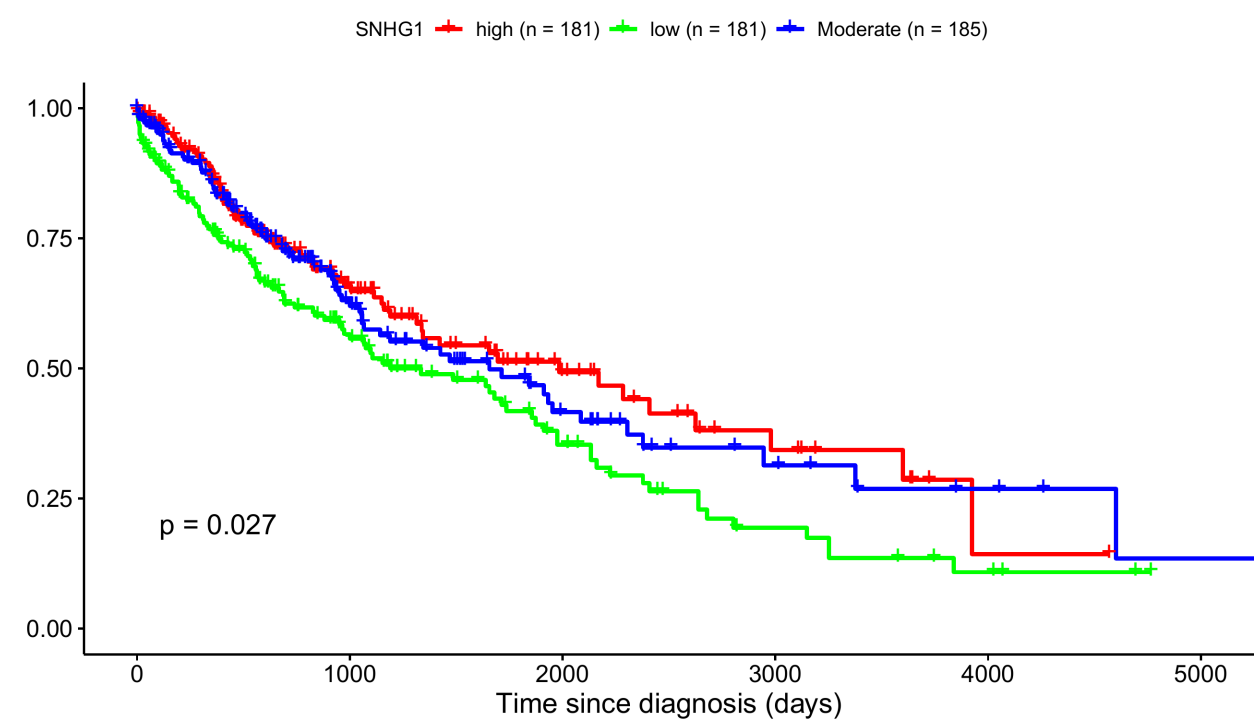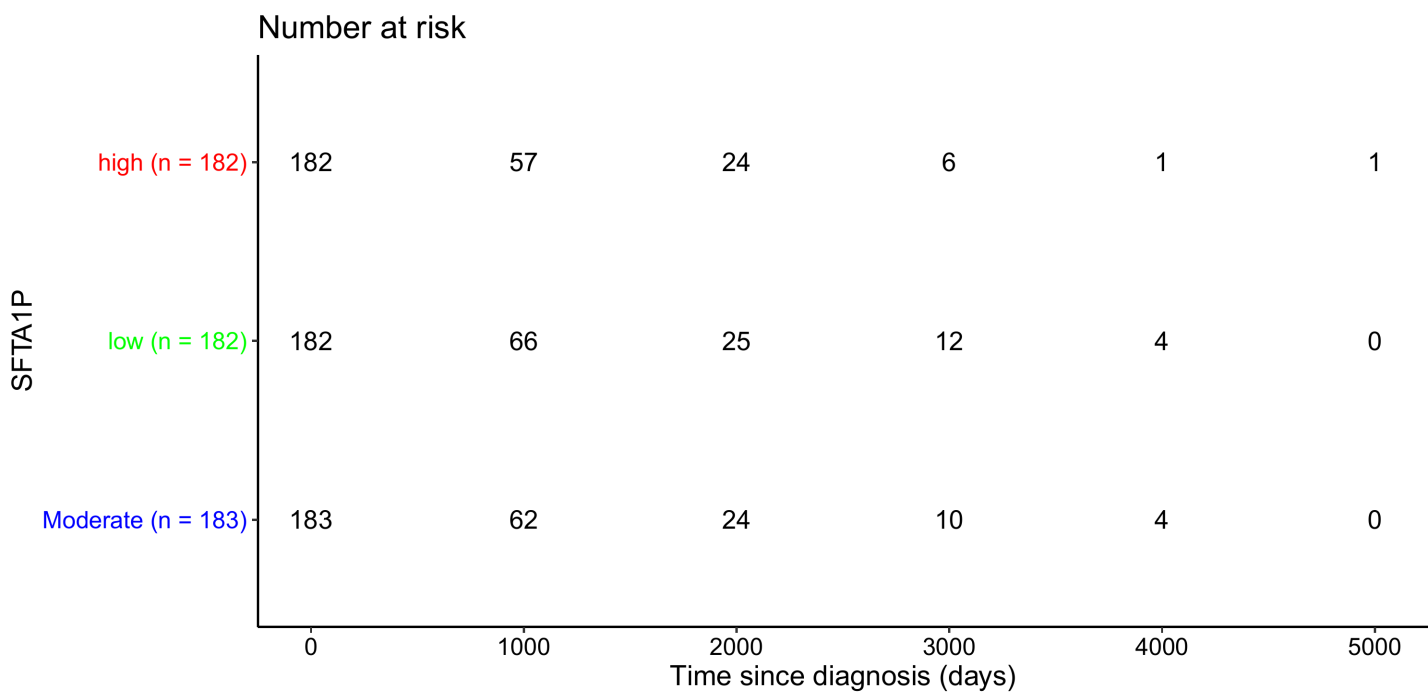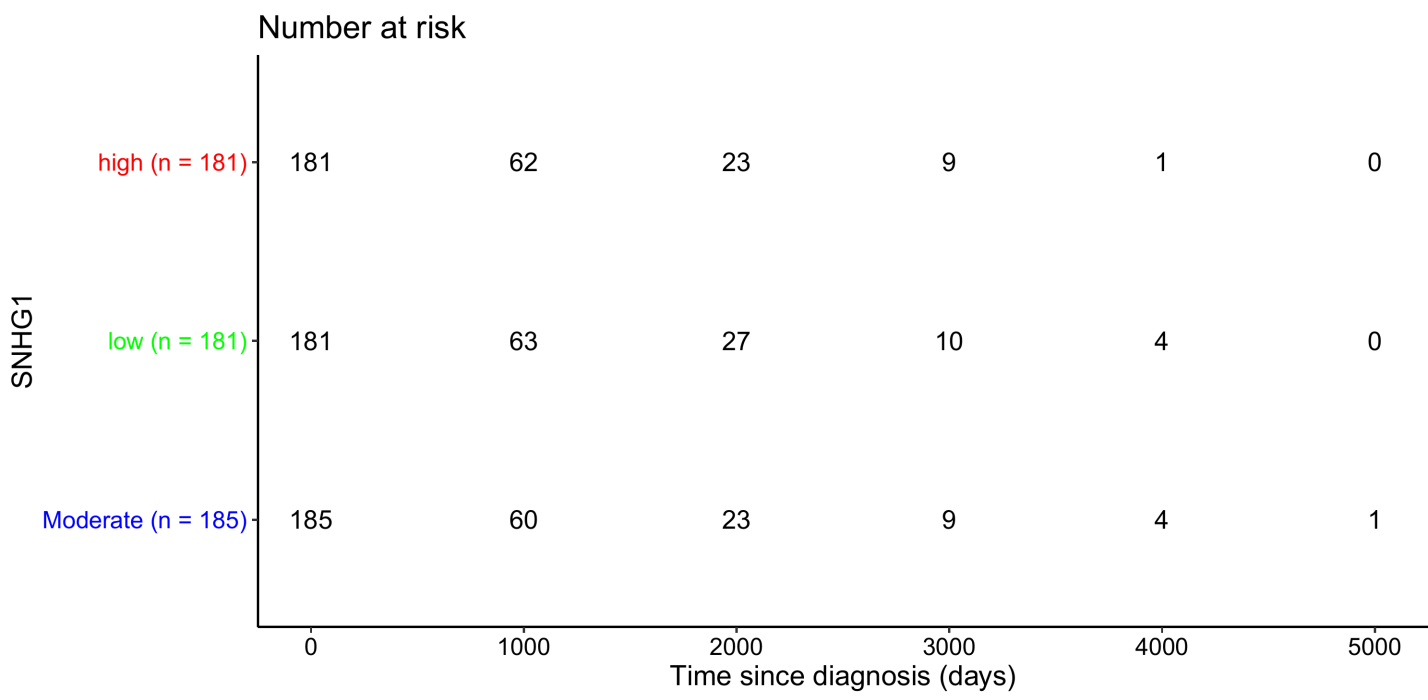

# FEA - Enriched BioFunctions

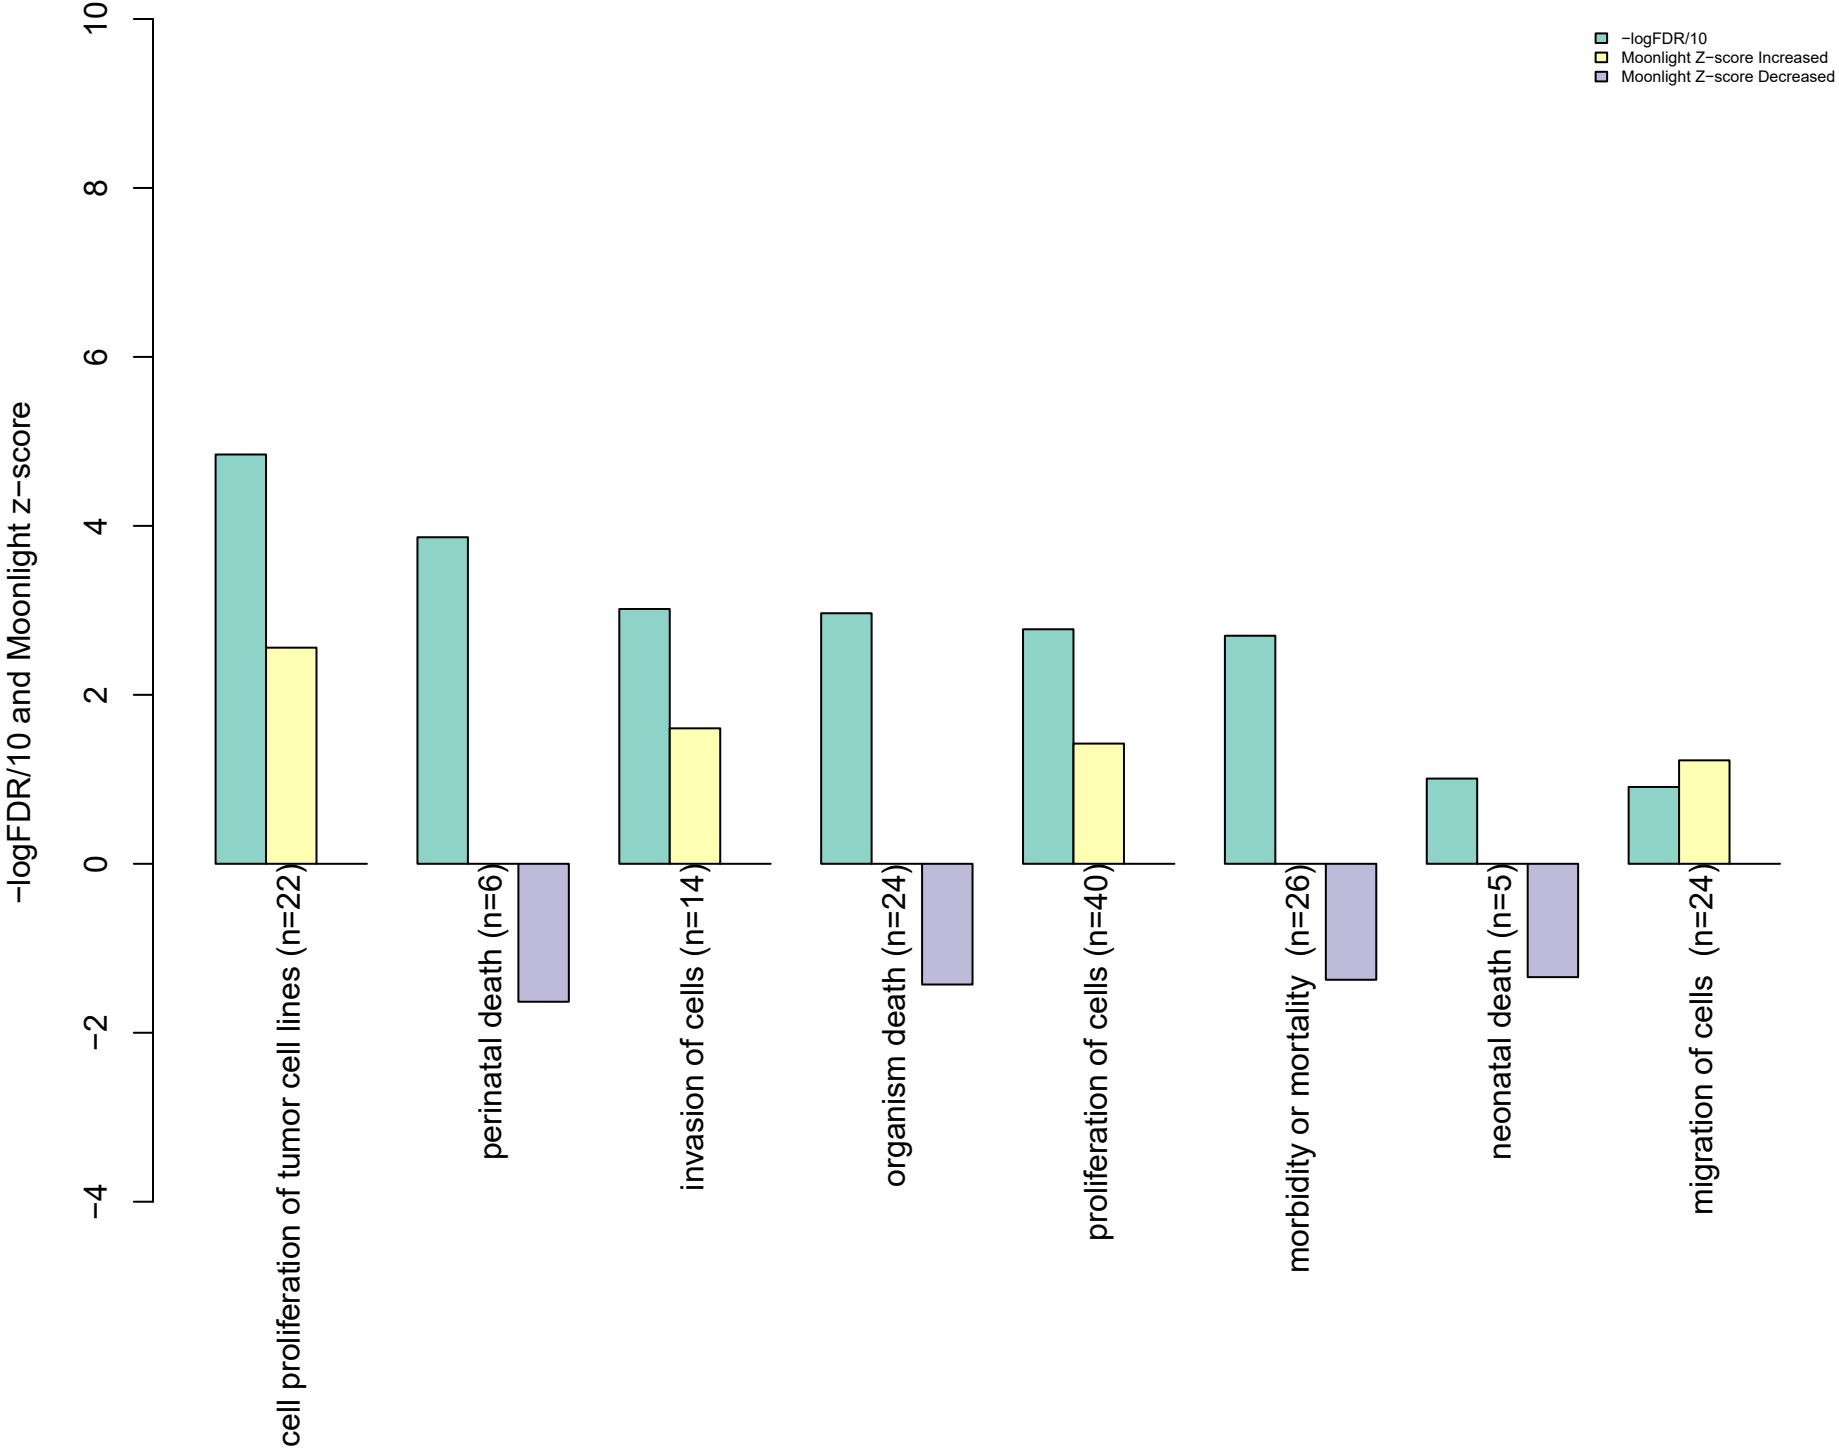

Supplement: 41598_2018_34160_MOESM1_ESM.pdf [file 41598_2018_34160_MOESM1_ESM.pdf]
